# Supplementary material
Source: publisher figshare collection journal article supplement (https://acs.figshare.com/ndownloader/files/4695055)
Supplement: Supplementary file 1 [file 4695055]

## Supplementary material for Bordat *et al.*

### 'Structure and dynamics of AlPO<sub>4</sub>-5 and other aluminophosphates'

*BKS\_model\_P1min.out*: unit cell and fractional coordinates of the analytically minimised structure of AlPO<sub>4</sub>-5 in the BKS model.

*zeroed\_structure.xyz*: XYZ file for the atomic cartesian coordinates in the minimum (BKS model) obtained by coupling an MD simulation to a heat bath at 0K.

*averaged\_structure\_300K.xyz*: XYZ file with the thermally averaged atomic coordinates, averaged over a particular period (about 10ps) during which the simulation with the BKS model remained in one of the three settings obtained by energy minimisation (the same setting as in *zeroed\_structure.xyz*)

*smallcluster.xyz* and *bigcluster.xyz*: sample AlO<sub>4</sub> tetrahedron and Al<sub>4</sub>P<sub>4</sub>O<sub>16</sub> cluster, i.e. Al with zero and four phosphorous atoms in the second coordination shell, cut out of the AlPO<sub>4</sub>-5 crystal optimised with the BKS force-field and saturated with hydrogens (which were optimised in *ab initio* calculations before GIAO calculation of the <sup>27</sup>Al chemical shifts).
